# Supplementary material for: Rare Pathogenic Variants in Genes Implicated in Glutamatergic Neurotransmission Pathway Segregate with Schizophrenia in Pakistani Families
Source: MDPI journal article supplement (doi:10.3390/genes12121899), 2021-11-26
Supplement: s1 [file s1]

**Supplementary Tables and Figures**

**Title: Rare Pathogenic Variants in Genes Implicated in Glutamatergic Neurotransmission Pathway Segregate with Schizophrenia in Pakistani Families**

**Supplementary Table S1: Clinical information of all affected family members of both families A and B**

| Family ID | Sample ID | Sex (M/F) | Age (Y) | Age of onset (Y) | Education | Marital Status | Hallucinations | Delusions | Disorganized speech | Abnormal psychomotor behavior | Social withdrawal/ lack of emotions | Depression | Mania |
|-----------|-----------|-----------|---------|------------------|-----------|----------------|----------------|-----------|---------------------|-------------------------------|-------------------------------------|------------|-------|
| Family A  | III:1     | M         | 39      | 22               | FA        | Single         | +              | +         | +                   | +                             | -                                   | +          | +     |
| Family A  | III:4     | F         | 35      | 24               | Matric    | Single         | +              | +         | +                   | +                             | +                                   | +          | +     |
| Family A  | II:3      | F         | 67      | 24               | Nil       | Married        | +              | +         | +                   | +                             | +                                   | +          | -     |
| Family B  | III:5     | M         | 48      | 20               | Nil       | Divorced       | +              | +         | +                   | +                             | +                                   | -          | +     |
| Family B  | IV:8      | F         | 39      | 20               | Primary   | Married        | +              | -         | -                   | -                             | -                                   | +          | -     |
| Family B  | III:7     | F         | 63      | 25               | Nil       |                | +              | +         | -                   | -                             | -                                   | -          | -     |
| Family B  | V:1       | F         | 18      | 15               | Primary   | Single         | -              | +         | -                   | -                             | +                                   | -          | -     |
| Family B  | III:4     | F         | 39      | 21               | Primary   | Divorced       | -              | +         | -                   | +                             | +                                   | +          | -     |
| Family B  | IV:7      | F         | 36      | 19               | Nil       | Married        | +              | +         | +                   | -                             | +                                   | -          | -     |

F: Female, M: Male, Y: Years, \* +: present, -: Absent

**Supplementary Table S2: Primers sequence used for break point (bp) characterization.**

| Primer Name      | Primer sequence        |
|------------------|------------------------|
| XRCC4_JMY_dup_F1 | TGGCAGGTGAGAGAGAAGAG   |
| XRCC4_JMY_dup_F2 | GGTCCTAGGTCAACATCTGG   |
| XRCC4_JMY_dup_R  | GGCACTTCACGTACATTCTTTC |

**Supplementary Table S3: Primer Sequences used for amplification and Sanger sequencing of Exon variatns**

| Primer Name | Pimer Sequence        | Variant   | Restriciton Enzyme |
|-------------|-----------------------|-----------|--------------------|
| GRIN2A-F    | TCGCTGGTCTCACTGTGC    | c.3505C>T | BSTXI              |
| GRIN2A-R    | CCTGAAAACCAAATCAAGCTC |           |                    |

**Supplementary Table S4: All CNVs present in proband III-1 Family A analyzed at 1kb with 10 markers.**

| CN State | Type | Size (kbp) | Chr | Cytoband | Position             | Genes                                                                                                                                                                                                                                                   |
|----------|------|------------|-----|----------|----------------------|---------------------------------------------------------------------------------------------------------------------------------------------------------------------------------------------------------------------------------------------------------|
| 1.0      | LOSS | 7,205      | 1   | p13.3    | 110232961-110240166  | <i>GSTM1</i>                                                                                                                                                                                                                                            |
| 1.0      | LOSS | 7,258      | 1   | p31.1    | 72756100-72763358    | -                                                                                                                                                                                                                                                       |
| 4.0      | GAIN | 42,651     | 1   | p31.1    | 72768485-72811136    | -                                                                                                                                                                                                                                                       |
| 1.0      | LOSS | 51,04      | 1   | p36.11   | 25595934-25646974    | <i>RHD</i>                                                                                                                                                                                                                                              |
| 1.0      | LOSS | 36,868     | 1   | p36.33   | 61722-98590          | <i>OR4F5</i>                                                                                                                                                                                                                                            |
| 4.0      | GAIN | 30,828     | 1   | q21.3    | 152555754-152586582  | <i>LCE3C, LCE3B</i>                                                                                                                                                                                                                                     |
| 0.0      | LOSS | 5,597      | 1   | q25.1    | 174796543- 174802140 | <i>RABGAP1L</i>                                                                                                                                                                                                                                         |
| 1.0      | LOSS | 10,256     | 2   | p23.3    | 24601459- 24611715   | -                                                                                                                                                                                                                                                       |
| 1.0      | LOSS | 53,186     | 2   | q11.2    | 98108991- 98162177   | <i>ANKRD36B</i>                                                                                                                                                                                                                                         |
| 1.0      | LOSS | 8,136      | 2   | q31.2    | 180413349- 180421485 | <i>ZNF385B</i>                                                                                                                                                                                                                                          |
| 1.0      | LOSS | 112,537    | 3   | q26.1    | 162513446- 162625983 | -                                                                                                                                                                                                                                                       |
| 3.0      | GAIN | 5,002      | 3   | q29      | 192877889- 192882891 | -                                                                                                                                                                                                                                                       |
| 1.0      | LOSS | 24,858     | 4   | p16.1    | 9461217- 9486075     | -                                                                                                                                                                                                                                                       |
| 1.0      | LOSS | 2,716      | 4   | p16.1    | 10228770- 10231486   | -                                                                                                                                                                                                                                                       |
| 1.0      | LOSS | 11,006     | 4   | q12      | 55104742- 55115748   | <i>PDGFRA</i>                                                                                                                                                                                                                                           |
| 1.0      | LOSS | 164,678    | 4   | q13.2    | 69375335-69375335    | <i>UGT2B17, UGT2B15</i>                                                                                                                                                                                                                                 |
| 1.0      | LOSS | 7,267      | 4   | q22.1    | 91287151-91287151    | <i>FAM190A</i>                                                                                                                                                                                                                                          |
| 1.0      | LOSS | 10,682     | 4   | q32.3    | 168616719-168616719  | -                                                                                                                                                                                                                                                       |
| 4.0      | GAIN | 3.05       | 4   | q34.1    | 172374871-172374871  | -                                                                                                                                                                                                                                                       |
| 3.0      | GAIN | 3,832,238  | 5   | q14.1    | 78553549-78553549    | <i>JMY, HOMER1, PAPD4, CMYA5, MTX3, THBS4, SERINC5, LOC644936, SPZ1, CRSP8P, ZFYVE16, FAM151B, ANKRD34B, DHFR, MTRNR2L2, MSH3, RASGRF2, RNU5E, RNU5D, CKMT2, LOC100131067, ZCCHC9, ACOT12, SSBP2, ATG10, RPS23, ATP6AP1L, TMEM167A, SCARNA18, XRCC4</i> |
| 1.0      | LOSS | 4,707      | 6   | p21.31   | 33937986- 33937986   | -                                                                                                                                                                                                                                                       |
| 1.0      | LOSS | 42,684     | 6   | p21.32   | 32454510-32497194    | <i>HLA-DRB5</i>                                                                                                                                                                                                                                         |
| 4.0      | GAIN | 2,727      | 6   | p22.3    | 16517338-16520065    | <i>ATXN1</i>                                                                                                                                                                                                                                            |
| 1.0      | LOSS | 5,346      | 6   | q14.1    | 81284176-81289522    | -                                                                                                                                                                                                                                                       |
| 4.0      | GAIN | 15,431     | 6   | q22.33   | 129556516-129571947  | <i>LAMA2</i>                                                                                                                                                                                                                                            |
| 1.0      | LOSS | 1,183      | 6   | q26      | 161032088-161033271  | <i>LPA</i>                                                                                                                                                                                                                                              |
| 1.0      | LOSS | 7,016      | 7   | q21.3    | 97395447-97402463    | -                                                                                                                                                                                                                                                       |
| 1.0      | LOSS | 9,327      | 7   | q34      | 142476706-142486033  | <i>TRY6, PRSS2</i>                                                                                                                                                                                                                                      |
| 4.0      | GAIN | 115,953    | 7   | q35      | 143911611-144027564  | <i>OR2A42, OR2A1, OR2A9P, OR2A20P, OR2A7, LOC728377, CTAGE4</i>                                                                                                                                                                                         |
| 1.0      | LOSS | 9,903      | 8   | p21.2    | 24974430-24984333    | -                                                                                                                                                                                                                                                       |
| 4.0      | GAIN | 8,619      | 8   | p23.2    | 2247646-2256265      | -                                                                                                                                                                                                                                                       |
| 1.0      | LOSS | 6,825      | 8   | q23.3    | 115634894-115641719  | -                                                                                                                                                                                                                                                       |
| 1.0      | LOSS | 1,178,324  | 9   | p11.2    | 46038840-47217164    | <i>KGFLP1</i>                                                                                                                                                                                                                                           |
| 0.0      | LOSS | 10.37      | 9   | p21.3    | 23363102-23373472    | -                                                                                                                                                                                                                                                       |
| 4.0      | GAIN | 1,139      | 9   | q21.11   | 72028457-72029596    | -                                                                                                                                                                                                                                                       |
| 4.0      | GAIN | 2,792      | 10  | p12.2    | 24375250-24378042    | <i>KIAA1217</i>                                                                                                                                                                                                                                         |
| 3.0      | GAIN | 1,213,224  | 10  | q11.22   | 46966534-48179758    | <i>SYT15, GPRIN2, PPYR1, LOC643650, LOC728643, ANXA8, ANXA8L1, FAM25B, FAM25C, FAM25G, AGAP9, LOC642826, FAM35B2, ANTXRL, ANXA8L2, FAM21B, CTSLL2</i>                                                                                                   |
| 4.0      | GAIN | 5,901      | 11  | p15.4    | 4968116-4974017      | <i>OR51A4</i>                                                                                                                                                                                                                                           |
| 1.0      | LOSS | 7,572      | 12  | p11.21   | 33299790-33307362    | -                                                                                                                                                                                                                                                       |
| 1.0      | LOSS | 4,991      | 12  | q24.13   | 112894499-112899490  | <i>PTPN11</i>                                                                                                                                                                                                                                           |
| 4.0      | GAIN | 31,078     | 14  | q32.33   | 106530351-106561429  | -                                                                                                                                                                                                                                                       |
| 1.0      | LOSS | 11,614     | 15  | q11.1    | 20569938-20581552    | -                                                                                                                                                                                                                                                       |
| 1.0      | LOSS | 204,831    | 15  | q11.2    | 22383188-22588019    | <i>OR4N4, OR4N3P, RREP3</i>                                                                                                                                                                                                                             |
| 1.0      | LOSS | 296,827    | 16  | p13.12   | 14780641-15077468    | <i>PLA2G10, ABCC6P2, NMO1, MIR3179-2, MIR3179-1, MIR3179-3, MIR3180-3, MIR3180-1, MIR3180-2, NPIP, PDXDC1</i>                                                                                                                                           |
| 1.0      | LOSS | 17,122     | 17  | q21.2    | 39413397-39430519    | -                                                                                                                                                                                                                                                       |
| 1.0      | LOSS | 16,288     | 17  | q21.31   | 41259367-41275655    | <i>BRCA1</i>                                                                                                                                                                                                                                            |
| 3.0      | GAIN | 323.62     | 17  | q21.31   | 44428668-44752288    | <i>ARL17A, ARL17B, NSFPI, LRRC37A2, NSF</i>                                                                                                                                                                                                             |
| 4.0      | GAIN | 4,592      | 18  | q12.3    | 38260785-38265377    | -                                                                                                                                                                                                                                                       |
| 4.0      | GAIN | 2,317      | 18  | q22.1    | 64959194-64961511    | -                                                                                                                                                                                                                                                       |
| 1.0      | LOSS | 38,233     | 20  | p13      | 1560909-1599142      | <i>SIRPB1</i>                                                                                                                                                                                                                                           |
| 4.0      | GAIN | 12,958     | 21  | q22.3    | 45486269-45499227    | <i>TRAPPC10</i>                                                                                                                                                                                                                                         |
| 1.0      | LOSS | 43,302     | 22  | q11.23   | 24353500-24396802    | <i>LOC391322, GSTT1, GSTTP2</i>                                                                                                                                                                                                                         |

|     |      |        |   |        |                     |                       |
|-----|------|--------|---|--------|---------------------|-----------------------|
| 2.0 | GAIN | 28,661 | X | p11.23 | 48968008-48996669   | <i>GPKOW</i>          |
| 2.0 | GAIN | 85,371 | X | q21.31 | 88599251-88684622   | -                     |
| 2.0 | GAIN | 85,105 | X | q21.31 | 89849760-89934865   | -                     |
| 2.0 | GAIN | 51,615 | X | q21.31 | 91162117-91213732   | <i>PCDH11X</i>        |
| 2.0 | GAIN | 14,274 | X | q21.32 | 92331809-92346083   | -                     |
| 2.0 | GAIN | 22,756 | X | q26.3  | 134857306-134880062 | <i>CT45A2, CT45A4</i> |
| 2.0 | GAIN | 28,393 | X | q27.3  | 143402115-143430508 | -                     |

**Supplementary Table S5: Brief description of all refseq genes present in 5q14.1 duplication**

| Gene                | protein                                                    | Function                                                                                                                                                           | Disease Association                                     | References                   |
|---------------------|------------------------------------------------------------|--------------------------------------------------------------------------------------------------------------------------------------------------------------------|---------------------------------------------------------|------------------------------|
| <b>JMY</b>          | Junction-Mediating And -Regulatory Protein                 | Acts as a nuclear p53/TP53-cofactor and a cytoplasmic regulator of actin dynamics.                                                                                 | hypoxia, breast cancer.                                 | Coutts <i>et al</i> : 2011   |
| <b>HOMER1</b>       | Scaffolding protein                                        | Binds and cross-links cytoplasmic regions of GRM1, GRM5, ITPR1, DNM3, RYR1, RYR2, SHANK1 and SHANK3 due to its role in PSD it is a most convincing candidate gene. | neurological diseases, Schizophrenia                    | Luo <i>et al</i> : 2012      |
| <b>PAPD4</b>        | PAP-Associated Domain-Containing Protein 4                 | PAPD4 is involved in a mechanism that controls miRNA-related activities in the nervous system.                                                                     | sleeping sickness                                       | Kinjoa <i>et al</i> : 2013   |
| <b>CMYA5</b>        | Cardiomyopathy Associated 5                                | Serve as an anchoring protein that mediates the subcellular compartmentation of protein kinase A (PKA).                                                            | Schizophrenia, skeletal muscle regeneration             | Chen <i>et al</i> : 2010     |
| <b>MTX3</b>         | Metaxin 3                                                  | Function in transport of proteins into the mitochondrion.                                                                                                          | charcot-marie-tooth neuropathy x, system lymphoma       |                              |
| <b>THBS4</b>        | Thrombospondin 4                                           | Adhesive glycoprotein that mediates cell-to-cell and cell-to-matrix interactions                                                                                   | breast cancer, mycetoma,                                |                              |
| <b>SERINC5</b>      | Serine Incorporator 51                                     | Carrier protein involve in lipid biosynthesis.                                                                                                                     | Borderline personality (BP) disorder                    | Lubke <i>et al</i> : 2013    |
| <b>LOC644936</b>    | Actin, Beta Pseudogene                                     | -                                                                                                                                                                  | -                                                       | -                            |
| <b>SPZ1</b>         | Spermatogenic Leucine Zipper 11                            | Involved in mitogen-activate protein kinase (MAPK) signaling pathway.                                                                                              | -                                                       | -                            |
| <b>CRSP8P</b>       | Mediator Complex Subunit 27 Pseudogene                     | -                                                                                                                                                                  | -                                                       | -                            |
| <b>ZFYVE16</b>      | Zinc Finger, FYVE Domain Containing 16                     | Belong to zinc finger family of proteins, implicated in regulating membrane trafficking in the endosomal pathway.                                                  |                                                         | Seet <i>et al</i> : 2004     |
| <b>FAM151B</b>      | Family With Sequence Similarity 151, Member B              | Protein coding gene.                                                                                                                                               |                                                         |                              |
| <b>ANKRD34B</b>     | Ankyrin Repeat Domain 34B                                  | Ankrd34b might be a positive regulator of neurogenesis and a negative regulator of adipogenesis.                                                                   |                                                         | Doss <i>et al</i> : 2010     |
| <b>DHFR</b>         | Dihydrofolate Reductase                                    | Converts dihydrofolate into tetrahydrofolate, a methyl group shuttle required for the de novo synthesis of purines, thymidylic acid, and certain amino acids.      | Isosporiasis, megaloblastic anemia                      | Milic <i>et al</i> : 2012    |
| <b>MTRNR2L2</b>     | MT-RNR2-Like 2                                             | Plays a role as a neuroprotective and antiapoptotic factor.                                                                                                        | Alzheimer's disease, neuronitis.                        |                              |
| <b>MSH3</b>         | MutS Homolog 3                                             | Involve in nucleotide mismatch and double-strand break repair.                                                                                                     | lynch syndrome, mucopidermoid carcinoma                 | Kumar <i>et al</i> : 2013    |
| <b>RASGRF2</b>      | Ras Protein-Specific Guanine Nucleotide-Releasing Factor 2 | Involve in synaptic plasticity also regulates alcohol-induced reinforcement by dopamine release.                                                                   | orofacial cleft, and colon cancer                       | Stacey <i>et al</i> : 2012   |
| <b>RNU5E</b>        | RNA, U5E small nuclear 1                                   | RNU5E-1 is RNA gene from snRNA class with largely unknown functions.                                                                                               | -                                                       | -                            |
| <b>RNU5D</b>        | RNA, U5D Small Nuclear 1                                   | RNU5D-1 is an RNA gene and is affiliated with the snRNA class.                                                                                                     | -                                                       | -                            |
| <b>CKMT2</b>        | Basic-Type Mitochondrial Creatine Kinase                   | CKMT2 is essential to energy metabolisms, responsible for the transfer of high energy phosphate from mitochondria to the cytosolic carrier, creatine.              | prostate rhabdomyosarcoma, and myopathy                 |                              |
| <b>LOC100131067</b> | non-coding RNA                                             |                                                                                                                                                                    |                                                         |                              |
| <b>ZCCHC9</b>       | Zinc Finger, CCHC Domain Containing 9                      | May play roles in the Mitogen-Activated Protein Kinase (MAPK) signaling transduction pathway.                                                                      | intrahepatic cholangiocarcinoma, and cholangiocarcinoma | Zhou <i>et al</i> : 2008     |
| <b>ACOT12</b>       | Acyl-CoA Thioesterase 12                                   | Hydrolyze the thioester bond of acetyl-CoA in the cytosol in the liver.                                                                                            | pericarditis, and cleft palate                          | Horibata <i>et al</i> : 2013 |
| <b>SSBP2</b>        | Single-Stranded DNA Binding Protein 2                      | Involved in the maintenance of genome stability.                                                                                                                   | Acute lymphocytic leukemia and lissencephaly.           | Huang <i>et al</i> : 2009    |
| <b>ATG10</b>        | Autophagy Related 10                                       | Play a role in autophagy.                                                                                                                                          | Myelodysplastic syndromes, and several types of cancers | Flanagan <i>et al</i> : 2012 |

|                        |                                                                            |                                                                                                                         |                                                                  |                             |
|------------------------|----------------------------------------------------------------------------|-------------------------------------------------------------------------------------------------------------------------|------------------------------------------------------------------|-----------------------------|
| <b><i>RPS23</i></b>    | Ribosomal Protein S23                                                      | A typical for genes encoding ribosomal proteins.                                                                        | pasteurellosis, and<br>ascariasis,                               |                             |
| <b><i>ATP6AP1L</i></b> | ATPase, H <sup>+</sup> Transporting,<br>Lysosomal Accessory Protein 1-Like | Proton-transporting ATP synthase activity.                                                                              |                                                                  |                             |
| <b><i>TMEM167A</i></b> | Transmembrane Protein 167A                                                 | Is affiliated with the lncRNA class.                                                                                    |                                                                  |                             |
| <b><i>SCARNA18</i></b> | Small Cajal Body-Specific RNA 18                                           | Noncoding RNAs involved in RNA processing.                                                                              |                                                                  |                             |
| <b><i>XRCC4</i></b>    | X-Ray Repair Cross-Complementing<br>Protein 4                              | Involved in DNA non-homologous end joining (NHEJ)<br>required for double-strand break repair and V(D)J<br>recombination | xeroderma<br>pigmentosum,<br>group d, and<br>artemis deficiency, | Brandi <i>et al.</i> : 2013 |

**Supplementary Table S6: Pathogenicity score predicted by *in silico* tools**

| Prediction tool      | Function                                             | Prediction                                            |                                                          |
|----------------------|------------------------------------------------------|-------------------------------------------------------|----------------------------------------------------------|
|                      |                                                      | <i>NRG3</i> :NM_001010848.4: c.1951G>A; p.(Glu651Lys) | <i>GRIN2A</i> :NM_001134407.3: c.3505C>T; p.(Arg1169Trp) |
| <b>PROVEAN</b>       | Protein variation effect analyzer                    | Neutral (-0.483 )                                     | Neutral (-1.357)                                         |
| <b>CADD</b>          | Combined Annotation Dependent Depletion              | 27.2                                                  | 22.8                                                     |
| <b>SNPs &amp; GO</b> | Variant effect prediction using gene ontology terms  | Disease causing                                       | Disease causing                                          |
| <b>PANTHER</b>       | Protein analysis through evolutionary Relationships  | Probably damaging                                     | Probably damaging                                        |
| <b>SIFT</b>          | Predict effects of nonsynonymous / missense variants | Neutral<br>0.190                                      | Disease<br>0.020                                         |
| <b>SNAP</b>          | Prediction of nonsynonymous functional effects       | Disease<br>0.685                                      | Disease<br>0.610                                         |
| <b>Meta-SNP</b>      | Meta-predictor of disease causing variants           | Diseases<br>0.593                                     | Disease<br>0.659                                         |



**Supplementary Figure S1:** Integrative Genomics Viewer (IGV) screenshot of mate-pair data showing the increased coverage of reads corresponding to the duplication

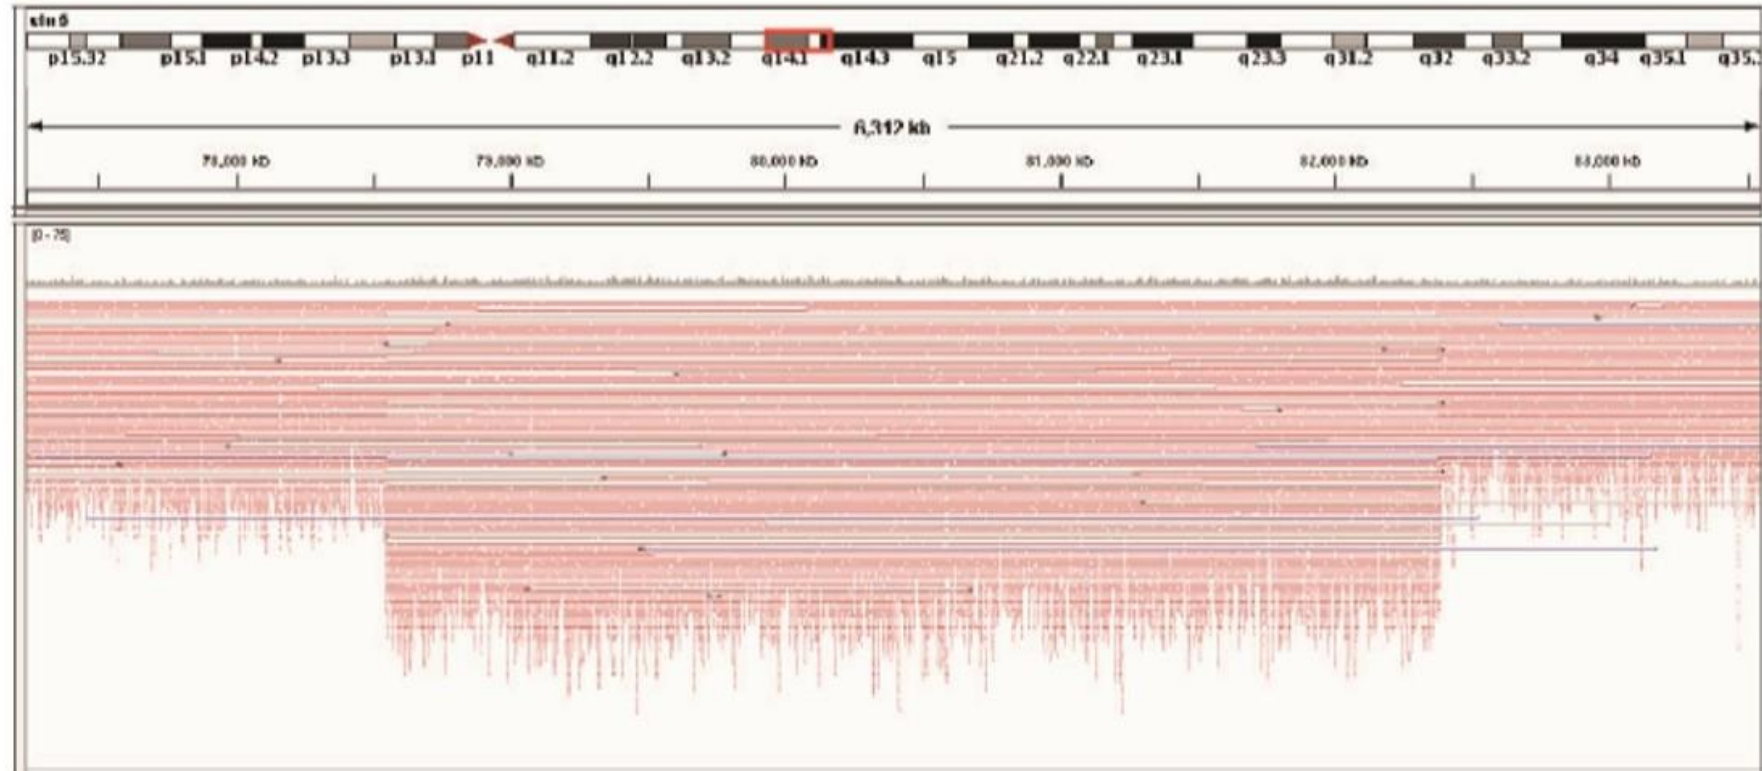

**Supplementary Figure S2:** A 385bp polymerase chain reaction (PCR) product spanning the direct tandem duplication junction (chr5:82387310:chr5:78545653) is only amplified in duplication carriers

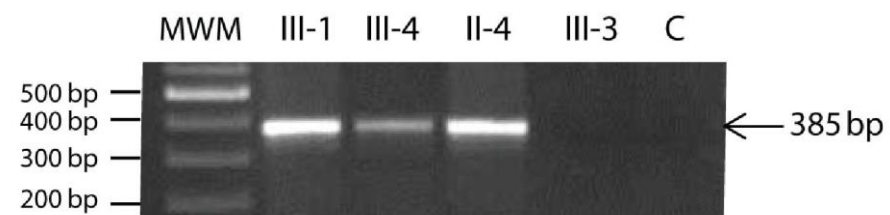

## Supplementary references

1. Coutts AS, Pires IM, Weston L *et al*: Hypoxia-driven cell motility reflects the interplay between JMY and HIF-1 $\alpha$ . *Oncogene* 2011; **30**: 4835–4842.
2. Luo P, Li X, Fei Z, Poon W: Scaffold protein Homer 1: Implications for neurological diseases. *Neurochem Int* 2012; **61**: 731–738.
3. Kinjo ER, Higa GS, de Sousa E *et al*: A possible new mechanism for the control of miRNA expression in neurons. *Exp Neurol* 2013; **248**: 546–558.
4. Chen X, Lee G, Maher BS *et al*: GWA study data mining and independent replication identify cardiomyopathy-associated 5 (CMYA5) as a risk gene for schizophrenia. *Mol Psychiatry* 2011; **16**: 1117–1129.
5. Lubke GH, Laurin C, Amin N *et al*: Genome-wide analyses of borderline personality features. *Mol Psychiatry* 2013; 1-7.
6. Seet LF, Liu N, Hanson BJ *et al*: Endofin recruits TOM1 to endosomes. *J. Biol. Chem* 2004; **279**: 4670-4679.
7. Doss MX, Wagh V, Schulz H, Kull M: Global transcriptomic analysis of murine embryonic stem cell-derived brachyury+ (T) cells. *Genes Cells* 2010; 209–228.
8. Milic V, Jekic B, Lukovic L *et al*: Association of dihydrofolate reductase (DHFR) -317AA genotype with poor response to methotrexate in patients with rheumatoid arthritis. *Clin Exp Rheumatol* 2012; **30**:178-183.
9. Kumar C, Williams GM, Havens B, Dinicola MK, Surtees JA: Distinct requirements within the Msh3 nucleotide binding pocket for mismatch and double-strand break repair. *J Mol Biol* 2013; **425**: 1881-98.
10. Stacey D, Bilbao A, Maroteaux M *et al*: RASGRF2 regulates alcohol-induced reinforcement by influencing mesolimbic dopamine neuron activity and dopamine release. *Proc Natl Acad Sci U S A* 2012; **109**: 21128-21133.
11. Zhou A, Zhou J, Yang L *et al*: A nuclear localized protein ZCCHC9 is expressed in cerebral cortex and suppresses the MAPK signal pathway. *J Genet Genomics* 2008; **35**: 467–472.
12. Horibata Y, Ando H, Itoh M, Sugimoto H: Enzymatic and transcriptional regulation of the cytoplasmic acetyl-CoA hydrolase ACOT12. *J Lipid Res* 2013; **54**: 2049-2059.
13. Huang J, Gong Z, Ghosal G, Chen J: SOSS complexes participate in the maintenance of genomic stability. *Mol Cell* 2009; **35**: 384-393.
14. Flanagan MD, Whitehall SK, Morgan BA: Structural insights into Atg10-mediated formation of the autophagy-essential Atg12-Atg5 conjugate. *Structure* 2012; **20**:1244-1254.
15. Mahaney BL, Hammel M, Meek K, Tainer JA, Lees-Miller SP: XRCC4 and XLF form long helical protein filaments suitable for DNA end protection and alignment to facilitate DNA double strand break repair. *Biochem Cell Biol* 2013; **91**: 31-41.
